# Supplementary material for: Novel Transmembrane Receptor Involved in Phagosome Transport of Lysozymes and β-Hexosaminidase in the Enteric Protozoan Entamoeba histolytica
Source: PLoS Pathog. 2012 Feb 23;8(2):e1002539. doi: 10.1371/journal.ppat.1002539 (PMC3285589; doi:10.1371/journal.ppat.1002539)
Supplement: Table S1 — The list of all detected peptides from excised bands by LC-MS/MS. (XLSX) [file ppat.1002539.s004.xlsx]

## Sheet: mass analysis
excised band	stain		Tota prot scorel1	%Cov2	Accession number	annotation	Species
A	CPBF8HA	1	40.37	27.6549	XM_647807, 101.m00123	CPBF8 101.t00012 AAFB01000362	E.histolytica
		2	12.38	21.645	TRYP_PIG (P00761)	Trypsin precursor (EC 3.4.21.4)	PIG
		3	7.08	5.28771	K2C1_HUMAN (P04264)	Keratin, type II cytoskeletal 1	HUMAN
	HA	1	17.54	14.7745	K2C1_HUMAN (P04264)	Keratin, type II cytoskeletal 1	HUMAN
		2	13.49	21.645	TRYP_PIG (P00761)	Trypsin precursor (EC 3.4.21.4)	PIG
		3	6.29	6.90209	K1C9_HUMAN (P35527)	Keratin, type I cytoskeletal 9	HUMAN
		4	5.33	5.05902	K1C10_HUMAN (P13645)	Keratin, type I cytoskeletal 10	HUMAN
		5	4.02	12.1951	TRY1_RAT (P00762)	Anionic trypsin I precursor	RAT
B	CPBF8HA	1	57.52	40.8186	XM_647807, 101.m00123	CPBF8 101.t00012 AAFB01000362	E.histolytica
		2	19.15	29.4372	TRYP_PIG (P00761)	Trypsin precursor (EC 3.4.21.4)	PIG
		3	8.54	6.99845	K2C1_HUMAN (P04264)	Keratin, type II cytoskeletal 1	HUMAN
		4	6.14	3.70995	K1C10_HUMAN (P13645)	Keratin, type I cytoskeletal 10	HUMAN
	HA	1	15.9	31.1688	TRYP_PIG (P00761)	Trypsin precursor (EC 3.4.21.4)	PIG
		2	7.63	5.13219	K2C1_HUMAN (P04264)	Keratin, type II cytoskeletal 1	HUMAN
C	CPBF8HA	1	59.86	35.0664	XM_647807, 101.m00123	CPBF8 101.t00012 AAFB01000362	E.histolytica
		2	17.28	26.4069	TRYP_PIG (P00761)	Trypsin precursor (EC 3.4.21.4)	PIG
		3	5.53	5.28771	K2C1_HUMAN (P04264)	Keratin, type II cytoskeletal 1	HUMAN
		4	2.06	5.60748	CAS1_BOVIN (P02662)	Alpha-S1-casein precursor	BOVIN
	HA	1	11.64	21.645	TRYP_PIG (P00761)	Trypsin precursor (EC 3.4.21.4)	PIG
		2	7.04	3.7325	K2C1_HUMAN (P04264)	Keratin, type II cytoskeletal 1	HUMAN
		3	3.4	10.2804	CAS1_BOVIN (P02662)	Alpha-S1-casein precursor	BOVIN
D	CPBF8HA	1	13.59	27.7056	TRYP_PIG (P00761)	Trypsin precursor (EC 3.4.21.4)	PIG
		2	13.14	7.85398	XM_647807, 101.m00123	CPBF8 101.t00012 AAFB01000362	E.histolytica
		3	8.67	7.15397	K2C1_HUMAN (P04264)	Keratin, type II cytoskeletal 1	HUMAN
		4	2.92	4.6729	CAS1_BOVIN (P02662)	Alpha-S1-casein precursor	BOVIN
	HA	1	12.3	21.645	TRYP_PIG (P00761)	Trypsin precursor (EC 3.4.21.4)	PIG
		2	11.35	8.8647	K2C1_HUMAN (P04264)	Keratin, type II cytoskeletal 1	HUMAN
		3	3.37	3.21027	K1C9_HUMAN (P35527)	Keratin, type I cytoskeletal 9	HUMAN
E	CPBF8HA	1	24.64	19.6809	XM_ 652437	Beta-hexosaminidase alpha chain precursor (EC 3.2.1.52)	E.histolytica
		2	14.86	21.645	TRYP_PIG (P00761)	Trypsin precursor (EC 3.4.21.4)	PIG
		3	8.84	7.15397	K2C1_HUMAN (P04264)	Keratin, type II cytoskeletal 1	HUMAN
		4	2.52	1.10619	XM_647807, 101.m00123	CPBF8 101.t00012 AAFB01000362	E.histolytica
		5	2.01	2.64026	DNAK_BACTR (Q9KWS7)	Chaperone protein dnaK	BACTR
	HA	1	16.07	17.5739	K2C1_HUMAN (P04264)	Keratin, type II cytoskeletal 1	HUMAN
		2	11.17	20.7792	TRYP_PIG (P00761)	Trypsin precursor (EC 3.4.21.4)	PIG
		3	7.62	7.70466	K1C9_HUMAN (P35527)	Keratin, type I cytoskeletal 9	HUMAN
		4	6.91	5.73356	K1C10_HUMAN (P13645)	Keratin, type I cytoskeletal 10	HUMAN
		5	4	10.2804	CAS1_BOVIN (P02662)	Alpha-S1-casein precursor	BOVIN
F	CPBF8HA	1	11.47	21.645	TRYP_PIG (P00761)	Trypsin precursor (EC 3.4.21.4)	PIG
		2	9.08	22.7273	XM_ 648202	lysozyme, putative	E.histolytica
		3	6.93	30.1887	XM_ 651841	lysozyme, putative	E.histolytica
	HA	1	23.94	26.4069	TRYP_PIG (P00761)	Trypsin precursor (EC 3.4.21.4)	PIG
		2	7.57	24.7191	LACB_BOVIN (P02754)	Beta-lactoglobulin precursor	BOVIN
		3	6.72	7.77605	K2C1_HUMAN (P04264)	Keratin, type II cytoskeletal 1	HUMAN
		4	2.92	2.02361	K1C10_HUMAN (P13645)	Keratin, type I cytoskeletal 10	HUMAN
		5	2.17	10.4545	XM_642940	calcium-binding protein, putative	E.histolytica
1:Total prot score was calculated by protein pilotTM software .
2:percentage of detected peptides within whole protein with over 95 % probability
